# Supplementary material for: Data management, documentation and analysis systems in radiation oncology: a multi-institutional survey
Source: Radiat Oncol. 2015 Nov 16;10:230. doi: 10.1186/s13014-015-0543-0 (PMC4647666; doi:10.1186/s13014-015-0543-0)
Supplement: Additional file 2: — Questionnaire in English. (PDF 116 kb) [file 13014_2015_543_MOESM2_ESM.pdf]

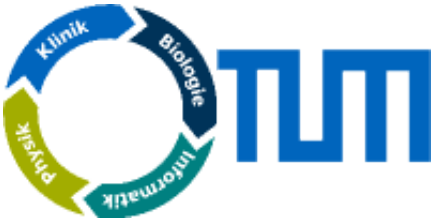

# Data management, documentation and analysis systems in radiation oncology

Dear colleagues in radiation oncology,

on the subject of **data management, documentation** and **trial analyses in radiation oncology** and thus **EDC systems** (electronic data capture), we have created the following survey. Please participate and take 10 minutes to complete the survey.

Most of the questions are mandatory. You need to enter "-" if you don't want to / can't make any comments. It might be helpful if an employee of the Physics / IT department is present as some questions about interfaces require special knowledge in the IT field.

We are pleased to inform you about the results.

Univ.-Prof. Dr. med. Stephanie E. Combs

Dr. sc. hum. Kerstin A. Kessel

1

## Name your department and contact information:

your department (name and country)

your name

your email address

2

## Electronic Health Record (EHR): What is correct? (Multiple answers possible)

- ☐ Our department uses the central hospital information system (HIS) for electronic documentation.
- ☐ Our department has an electronic health record (EHR) within the HIS.
- ☐ Our department uses an EHR independently from the HIS.
- ☐ An EHR is not established in our department.

3

## What kind of hardware / software solutions (company name) does your department use for ...

please fill out each field

HIS (hospital information system)

RIS (radiology information system)

PACS (picture archiving and communication system)

LIS (laboratory information system)

OIS (oncology information system e.g. Mosaik, Lantis...)

4

## In which central documentation projects does your department participate in?

- ☐ documentation in central databases, such as ESTRO, EORTC...

- ☐ multi-center clinical trials
- ☐ cancer registries / tumor documentation
- ☐ other

Type your answer

100 characters remaining

5

## Do you use "self-reported outcome" in your department?

|                                                                                                                                            | yes, as<br>paperbased<br>forms | yes, as digital<br>forms (e.g. on<br>a PC) | yes, as<br>webbased<br>forms  | not currently<br>▼       |
|--------------------------------------------------------------------------------------------------------------------------------------------|--------------------------------|--------------------------------------------|-------------------------------|--------------------------|
| "patient self-reported outcome"<br>= gen. questionnaires /<br>standardized questionnaires<br>about quality of life (e.g. EORTC<br>QLQ-C30) | ▼<br><input type="checkbox"/>  | ▼<br><input type="checkbox"/>              | ▼<br><input type="checkbox"/> | <input type="checkbox"/> |
| "physician reported outcome" of<br>referring physicians                                                                                    | <input type="checkbox"/>       | <input type="checkbox"/>                   | <input type="checkbox"/>      | <input type="checkbox"/> |

6

## What tools for documentation do you use in your department for prospective / retrospective trials / evaluations?

- ☐ paper
- ☐ Excel
- ☐ Access
- ☐ special documentation / analysis system
- ☐ other

7

## How would you assess the following obstacles regarding the implementation of a system for data management, documentation and analyses in your department?

|                                                                                   | very difficult        | difficult             | simple                | no problem            |
|-----------------------------------------------------------------------------------|-----------------------|-----------------------|-----------------------|-----------------------|
| IT infrastructure                                                                 | <input type="radio"/> | <input type="radio"/> | <input type="radio"/> | <input type="radio"/> |
| personnel structure / expertise                                                   | <input type="radio"/> | <input type="radio"/> | <input type="radio"/> | <input type="radio"/> |
| assistance of the central IT department                                           | <input type="radio"/> | <input type="radio"/> | <input type="radio"/> | <input type="radio"/> |
| funding                                                                           | <input type="radio"/> | <input type="radio"/> | <input type="radio"/> | <input type="radio"/> |
| consent of employees (including physicians, study nurses, etc.) to use the system | <input type="radio"/> | <input type="radio"/> | <input type="radio"/> | <input type="radio"/> |

8

## Are systems for documentation / EDC in use or planned for the following application scenarios?

|                                                            | system already implemented | system in planning stage | not planned / not necessary |
|------------------------------------------------------------|----------------------------|--------------------------|-----------------------------|
| for prospective clinical trials / scientific evaluations   | <input type="checkbox"/>   | <input type="checkbox"/> | <input type="checkbox"/>    |
| for retrospective clinical trials / scientific evaluations | <input type="checkbox"/>   | <input type="checkbox"/> | <input type="checkbox"/>    |
| for research documentation                                 | <input type="checkbox"/>   | <input type="checkbox"/> | <input type="checkbox"/>    |

for clinical routine  
documentation

☐☐☐

for data backup

☐☐☐

for quality assurance

☐☐☐

9

## Are other systems for any type of documentation used or planned in the future?

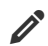

Type a sentence

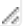

250 characters remaining

10

## If you think of other systems in your clinical environment, which interfaces / communication standards are used or planned for documentation?

already  
implemented

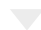

in planning stage

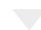

not planned

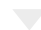

HL7 (ADT, ORU, DFT,...)

☐☐☐

DICOM (PACS...)

☐☐☐

HTML

☐☐☐

HTTPS

☐☐☐

Webservices

☐☐☐

FTP

☐☐☐

IHE conformity

☐☐☐

11

## What information is transferred via the interfaces / communication standards?

|                                                    | already<br>implemented<br>▼ | in planning stage<br>▼ | not planned<br>▼      |
|----------------------------------------------------|-----------------------------|------------------------|-----------------------|
| imaging data (diagnostic and therapeutic)          | <input type="radio"/>       | <input type="radio"/>  | <input type="radio"/> |
| radiation data (RT Plan, RT Dose, RT StructureSet) | <input type="radio"/>       | <input type="radio"/>  | <input type="radio"/> |
| surgical findings                                  | <input type="radio"/>       | <input type="radio"/>  | <input type="radio"/> |
| lab findings                                       | <input type="radio"/>       | <input type="radio"/>  | <input type="radio"/> |
| pathology findings                                 | <input type="radio"/>       | <input type="radio"/>  | <input type="radio"/> |
| follow-up information                              | <input type="radio"/>       | <input type="radio"/>  | <input type="radio"/> |
| clinical trial data                                | <input type="radio"/>       | <input type="radio"/>  | <input type="radio"/> |

12

## With respect to the last two questions: What other interfaces / communication standards are used / planned in your department? What other data is also transferred?

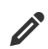

Type a sentence

250 characters remaining

13

## How do you rate the willingness of the following groups of people to use a documentation / EDC system?

very eager

relatively

reluctant

not

|                          | ▼                     | eager<br>▼            | ▼                     | documenting<br>▼      |
|--------------------------|-----------------------|-----------------------|-----------------------|-----------------------|
| documentation specialist | <input type="radio"/> | <input type="radio"/> | <input type="radio"/> | <input type="radio"/> |
| study nurses             | <input type="radio"/> | <input type="radio"/> | <input type="radio"/> | <input type="radio"/> |
| physician                | <input type="radio"/> | <input type="radio"/> | <input type="radio"/> | <input type="radio"/> |
| radiographer             | <input type="radio"/> | <input type="radio"/> | <input type="radio"/> | <input type="radio"/> |
| physician's assistant    | <input type="radio"/> | <input type="radio"/> | <input type="radio"/> | <input type="radio"/> |
| secretary                | <input type="radio"/> | <input type="radio"/> | <input type="radio"/> | <input type="radio"/> |
| other employees          | <input type="radio"/> | <input type="radio"/> | <input type="radio"/> | <input type="radio"/> |

14

## The responsible person(s) managing system(s) for EDC / documentation / analyses in your department ...

please fill out each field

completed what kind of training  
or has/have what degree?

has/have special expertise in?

manages/manage the system(s)  
as a primary or secondary task?

15

## Have you heard of the term "Big Data" in the context of health care?

- ☐ yes
- ☐ no

## Big Data in radiation oncology:

please fill out each field

To which extent has your department dealt with the subject of Big Data?

What measures do you plan in the future?

## Is your department already using cloud solutions?

☐

yes

☐

no

☐

in the planning stage

Type your answer

*100 characters remaining*

## Cloud solutions in radiation oncology:

please fill out each field

What solutions do you use?

For which scenarios?

## Do you have any comments about our survey?

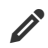

Type a paragraph

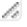

*1500 characters remaining*

**SUBMIT SURVEY**

It is easy to **create a survey** ([http://www.survio.com/en/?source=survey\\_footer&medium=link&term=survey\\_link](http://www.survio.com/en/?source=survey_footer&medium=link&term=survey_link)) free

✓ Powered by **Survio** ([http://www.survio.com/en/features?source=survey\\_footer&medium=link&term=brand](http://www.survio.com/en/features?source=survey_footer&medium=link&term=brand))
