# Supplementary material for: Data management, documentation and analysis systems in radiation oncology: a multi-institutional survey
Source: Springer Nature journal article supplement (doi:10.1186/s13014-015-0543-0), 2015-11-16
Supplement: MOESM1 [file 9774086]

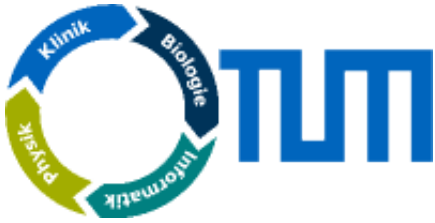

# Dokumentations- / Studien- / Auswertesysteme in der RadioOnkologie

Liebe Kolleginnen und Kollegen der Radioonkologie,

zum Thema **Studien und Auswertungen in der Radioonkologie** und den damit verbundenen **Dokumentations- bzw. EDC Systemen (electronic data capture = elektronische Datenerfassung)** haben wir folgende Umfrage erstellt. Wir würden uns freuen wenn Sie sich zum Ausfüllen 10 Minuten Zeit nehmen.

Die meisten Fragen enthalten Pflichtfelder. Sie müssen „-“ eingeben, wenn Sie keine Angaben machen können/wollen. Es ist ggf. hilfreich, wenn ein Mitarbeiter der Physik/IT beim Ausfüllen behilflich ist, da Fragen zu Schnittstellen Spezialkenntnisse im IT-Bereich voraussetzen.

Über die Ergebnisse werden wie Sie gerne informieren.

Univ.-Prof. Dr. med. Stephanie E. Combs      Dr. sc. hum. Kerstin A. Kessel

1

## Nennen Sie Ihre Abteilung und Kontaktinformationen:

Abteilung

Name Kontaktperson

E-Mail Kontaktperson

## Elektronische Patientenakte (EPA): Was trifft zu? (Mehrfachantworten möglich)

- Unsere Abteilung nutzt das zentrale Klinikinformationssystem (KIS) zur elektronischen Dokumentation.
- Unsere Abteilung führt innerhalb des KIS eine elektronische Patientenakte (EPA).
- Unsere Abteilung nutzt eine elektronische Patientenakte (EPA) unabhängig vom KIS.
- Eine elektronische Patientenakte (EPA) ist bei uns nicht etabliert.

## Welche Hard-/Software-Lösungen welcher Firmen nutzt Ihre Abteilung für ...

bitte machen Sie eine Angabe für jedes Feld

KIS  
(Krankenhausinformationssystem)

RIS  
(Radiologieinformationssystem)

PACS (Picture Archiving and  
Communication System)

LIS (Laborinformationssystem)

OIS  
(Onkologieinformationssystem  
z.B. Mosaik, Lantis...)

## An welchen zentralen Dokumentationsprojekten beteiligt sich Ihre Abteilung?

- Dokumentation in zentrale Datenbanken wie z.B. der ESTRO, EORTC...
- multizentrischen Studien
- Krebsregister / Tumordokumentation
- andere

5

## Nutzen Sie "self-reported outcome" in Ihrer Abteilung?

|                                                                                                                   | ja, als<br>Papierformular<br>▼ | ja, als<br>digitales<br>Formulare<br>(z.B. am PC)<br>▼ | ja, als<br>webbasiertes<br>Formular<br>▼ | aktuell nicht<br>▼       |
|-------------------------------------------------------------------------------------------------------------------|--------------------------------|--------------------------------------------------------|------------------------------------------|--------------------------|
| "patient self-reported outcome"<br>= allg. Fragebögen /<br>standardisierte QLQ Fragebögen<br>(z.B. EORTC QLQ-C30) | <input type="checkbox"/>       | <input type="checkbox"/>                               | <input type="checkbox"/>                 | <input type="checkbox"/> |
| "physician reported outcome"<br>von Zuweisern                                                                     | <input type="checkbox"/>       | <input type="checkbox"/>                               | <input type="checkbox"/>                 | <input type="checkbox"/> |

6

## Welche Dokumentationsvarianten nutzen Sie in Ihrer Abteilung für prospektive / retrospektive Studien / Auswertungen?

- Papier
- Excel
- Access
- spezielles Dokumentation- / Auswertessystem
- andere

## Wie würden Sie die folgende Hürden einschätzen bzgl. der Einführung eines Dokumentationssystems für Studien und Auswertungen in Ihrer klinischen Abteilung?

|                                                                                             | sehr schwierig        | schwierig             | einfach               | kein Problem          |
|---------------------------------------------------------------------------------------------|-----------------------|-----------------------|-----------------------|-----------------------|
| IT Infrastruktur                                                                            | <input type="radio"/> | <input type="radio"/> | <input type="radio"/> | <input type="radio"/> |
| Personelle Struktur / Expertise                                                             | <input type="radio"/> | <input type="radio"/> | <input type="radio"/> | <input type="radio"/> |
| Unterstützung des zentralen Rechenzentrums                                                  | <input type="radio"/> | <input type="radio"/> | <input type="radio"/> | <input type="radio"/> |
| Finanzierung                                                                                | <input type="radio"/> | <input type="radio"/> | <input type="radio"/> | <input type="radio"/> |
| Zustimmung von Mitarbeitern (u.a. Ärzten, study nurses etc.) in das System zu dokumentieren | <input type="radio"/> | <input type="radio"/> | <input type="radio"/> | <input type="radio"/> |

## Werden in Ihrer Abteilung für folgende Anwendungsszenarien Dokumentations- oder EDC (electronic data capture = elektronische Datenerfassung) Systeme eingesetzt oder planen Sie ein System in der Zukunft einzusetzen?

|                                                          | System ist bereits vorhanden | System ist geplant       | nicht geplant/<br>notwendig |
|----------------------------------------------------------|------------------------------|--------------------------|-----------------------------|
| für prospektive wissenschaftliche Studien / Auswertungen | <input type="checkbox"/>     | <input type="checkbox"/> | <input type="checkbox"/>    |
| für retrospektive                                        | <input type="checkbox"/>     | <input type="checkbox"/> | <input type="checkbox"/>    |

wissenschaftliche  
Auswertungen / Evaluationen

zur Forschungsdokumentation

in der klinischen Routine

zur Datensicherung

zum Qualitätsmanagement

9

**Gibt es andere Systeme, für jegliche Dokumentation, die aktuell bzw. zukünftig eingesetzt werden?**

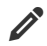

10

**Wenn Sie an andere Systeme im Kliniknetz denken, welche Schnittstellen / Kommunikationswege zum Dokumentationssystem werden genutzt oder sind geplant?**

bereits umgesetzt

in Planung

nicht in Planung

HL7 (ADT, ORU, DFT,...)

DICOM (PACS...)

HTML

HTTPS

Webservices

FTP

IHE Konformität

## Welche Informationen werden über die Schnittstellen / Kommunikationswege übertragen?

|                                                       | bereits umgesetzt     | in Planung            | nicht in Planung      |
|-------------------------------------------------------|-----------------------|-----------------------|-----------------------|
| Bilddaten (diagnostisch u. therapeutisch)             | <input type="radio"/> | <input type="radio"/> | <input type="radio"/> |
| Bestrahlungsdaten (RT Plan, RT Dose, RT StructureSet) | <input type="radio"/> | <input type="radio"/> | <input type="radio"/> |
| OP Berichte                                           | <input type="radio"/> | <input type="radio"/> | <input type="radio"/> |
| Laborbefunde                                          | <input type="radio"/> | <input type="radio"/> | <input type="radio"/> |
| Pathologiebefunde                                     | <input type="radio"/> | <input type="radio"/> | <input type="radio"/> |
| Nachsorgedaten                                        | <input type="radio"/> | <input type="radio"/> | <input type="radio"/> |
| Studienrelevante Daten                                | <input type="radio"/> | <input type="radio"/> | <input type="radio"/> |

## Bezüglich der letzten beiden Fragen: Welche andere Schnittstellen / Kommunikationswege werden in Ihrer Abteilung noch genutzt oder sind geplant? Welche anderen Daten werden auch übertragen?

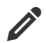


## Wie beurteilen Sie die Bereitschaft folgender Personengruppen ein Dokumentationssystem zu nutzen?

sehr willig      teilweise      unwillig      dokumentieren

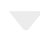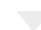

willig

nicht

spezielle Dokumentare

Study nurses

Ärzte

MTRA

Arzthelfer/in

Sekretär/in

andere Mitarbeiter

14

## Die zuständige Person / zuständigen Personen, welche die Systeme betreuen, ...

bitte machen Sie eine Angabe für jedes Feld

haben welche Ausbildung bzw. welchen Abschluss?

bringen welche besondere Expertise mit?

haben die Systembetreuung als Nebenaufgabe oder sind alleinig dafür eingestellt?

15

## Haben Sie schon von dem Begriff "Big Data" im Kontext von Gesundheitswesen gehört?

ja

nein

## Big Data in der RadioOnkologie:

bitte machen Sie eine Angabe für jedes Feld

In welchem Umfang hat sich  
Ihre Abteilung damit schon  
beschäftigt?

Welche Maßnahmen planen Sie  
in der Zukunft?

## Nutzen Sie bereits Cloud-Lösungen in Ihrer Abteilung?

ja

nein

in Planung

## Cloud Lösungen in der RadioOnkologie:

bitte machen Sie eine Angabe für jedes Feld

Welche Lösungen nutzen Sie?

Für welchen Szenarien?



## Haben Sie noch Kommentare zu unserer Umfrage?

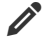

**ABSENDEN**

Kostenlos **Umfrage erstellen** ([http://www.surveio.com/de/?source=survey\\_footer&medium=link&term=survey\\_link](http://www.surveio.com/de/?source=survey_footer&medium=link&term=survey_link)) ✓

Powered by **Survio** ([http://www.surveio.com/de/merkmale-funktionen?source=survey\\_footer&medium=link&term=brand](http://www.surveio.com/de/merkmale-funktionen?source=survey_footer&medium=link&term=brand))
